# Supplementary material for: A study of anhydrocelluloses – Is a cellulose structure with residues in a 1C4-conformation more prone to hydrolysis?
Source: Royal Society of Chemistry journal article supplement (doi:10.1039/c1ob06085f), 2011-01-01
Supplement: c1ob06085f.pdf [file c1ob06085f.pdf]

**Supporting Information**  
**for**  
**A study of Anhydrocelluloses – Is a cellulose structure with residues**  
**in  $^1C_4$ -conformation more prone to hydrolysis?**

Vrushali Jadhav, Christian M. Pedersen\* and Mikael Bols\*

*Contribution from the Department of Chemistry, University of Copenhagen, DK-2100*

*Copenhagen Ø, Denmark*

Contents:

|        |                                                                                                  |
|--------|--------------------------------------------------------------------------------------------------|
| S2-S16 | NMR spectra of compounds                                                                         |
| S17    | Figure S1. Progress curves for formation of glucose from anhydrocelluloses by acidic hydrolysis. |
| S17    | Figure S2. Progress curve for formation of BMF ( <b>21</b> ).                                    |
| S18    | Figure S3. Progress curve for formation of CMF ( <b>22</b> ).                                    |
| S18    | Figure S4. Progress curve for formation of HMF ( <b>23</b> ).                                    |

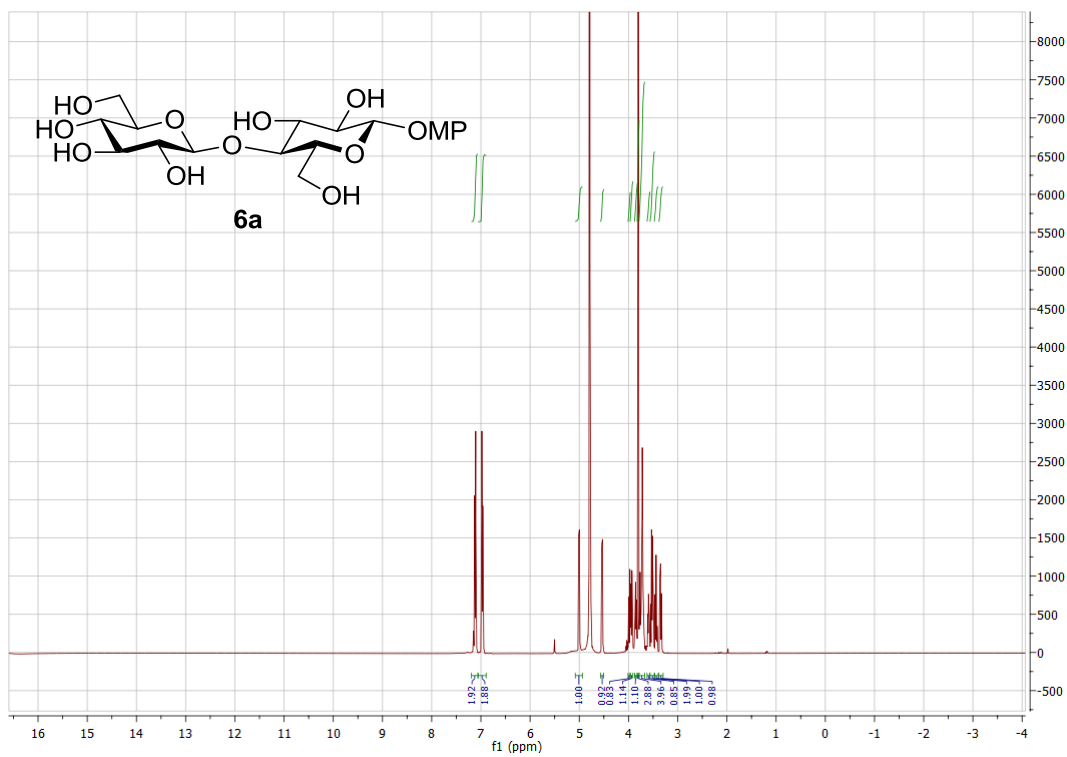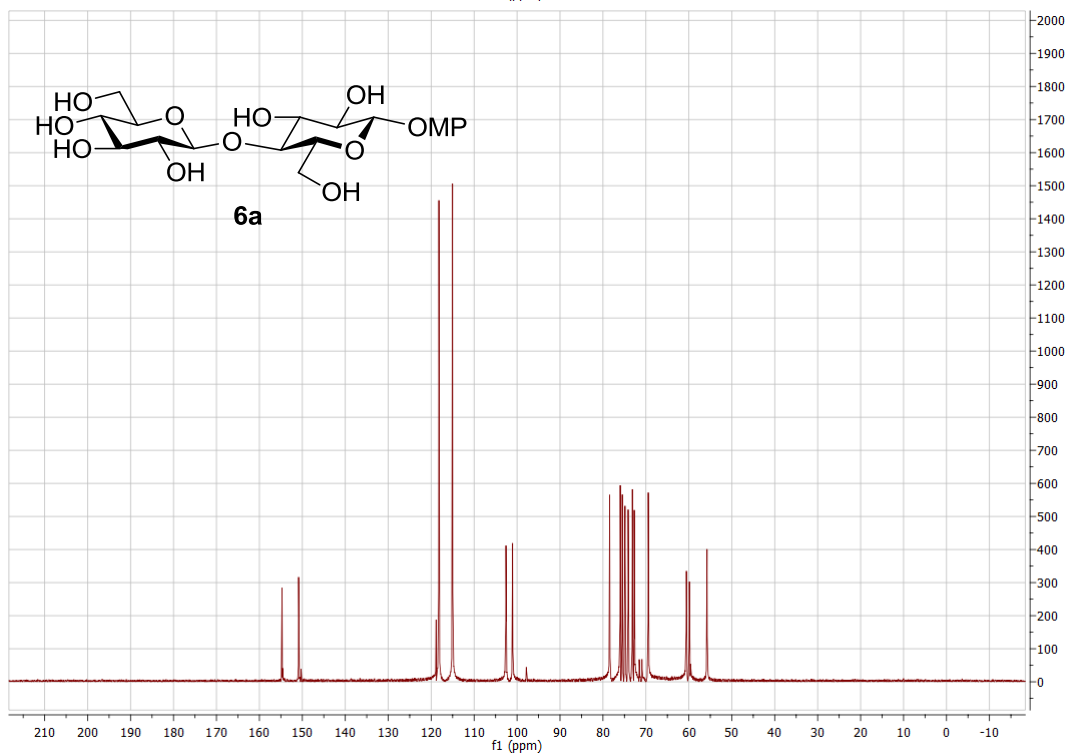

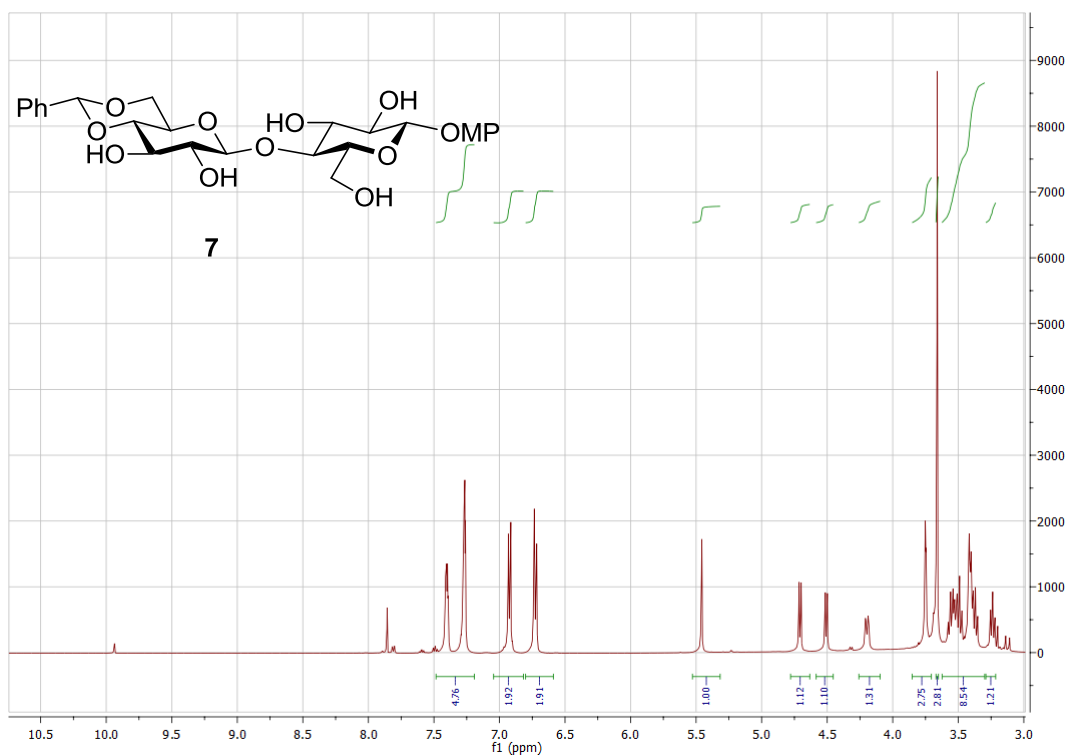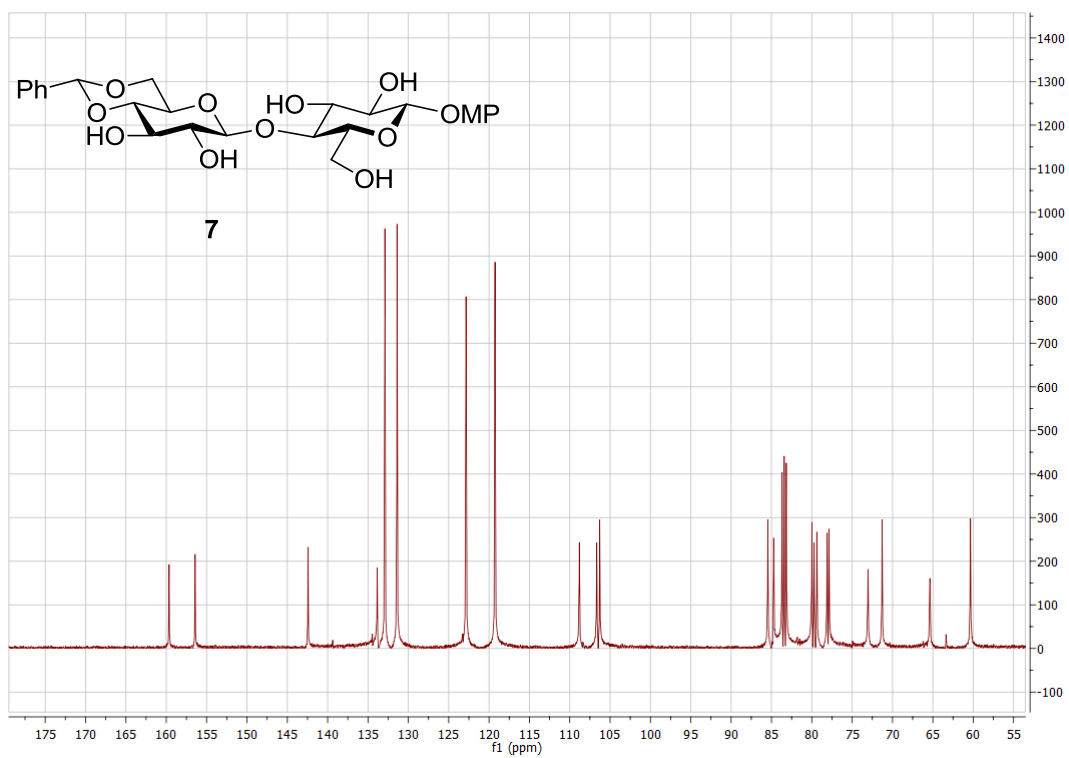

S4

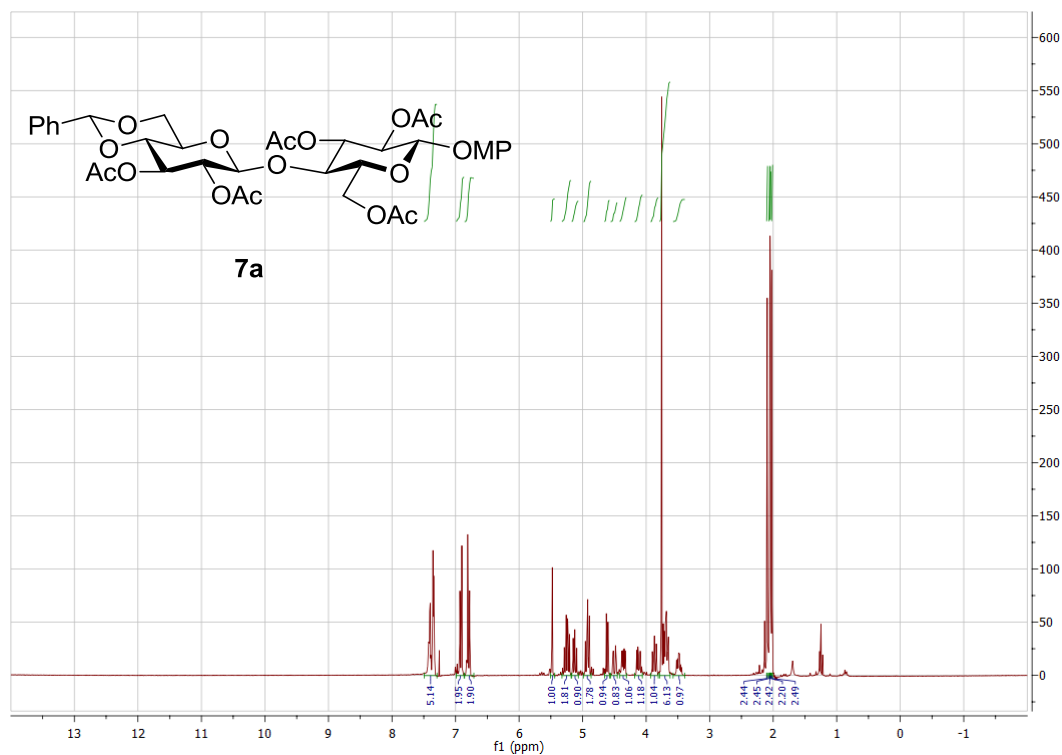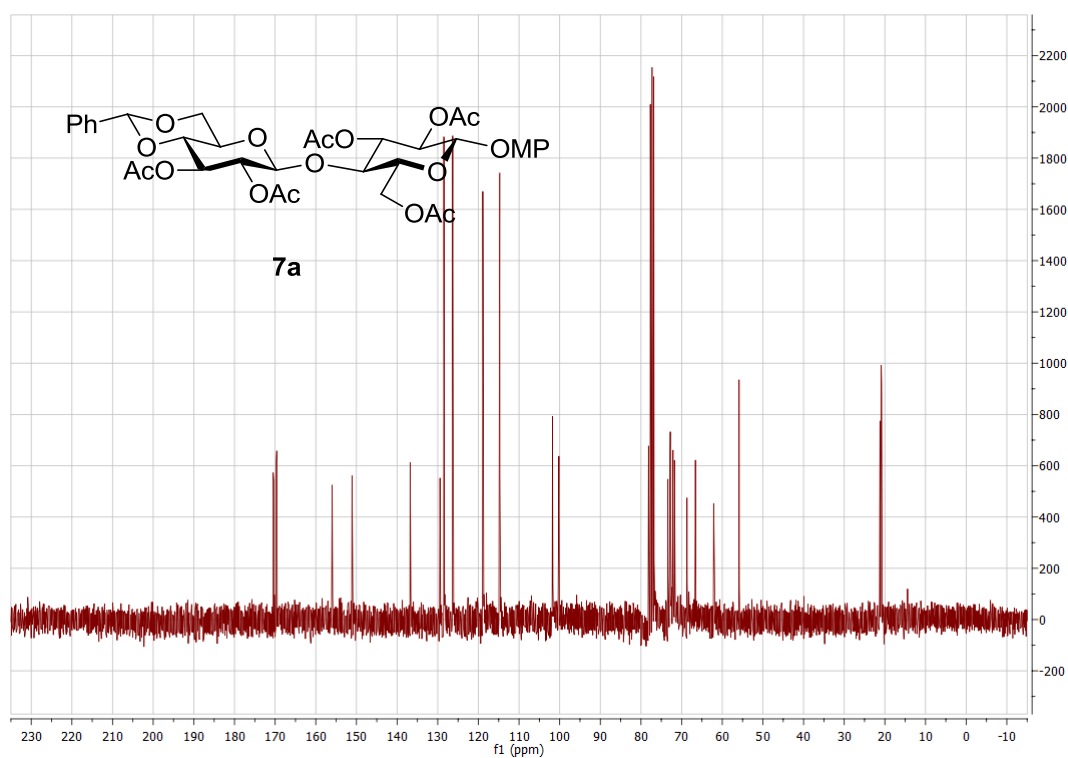

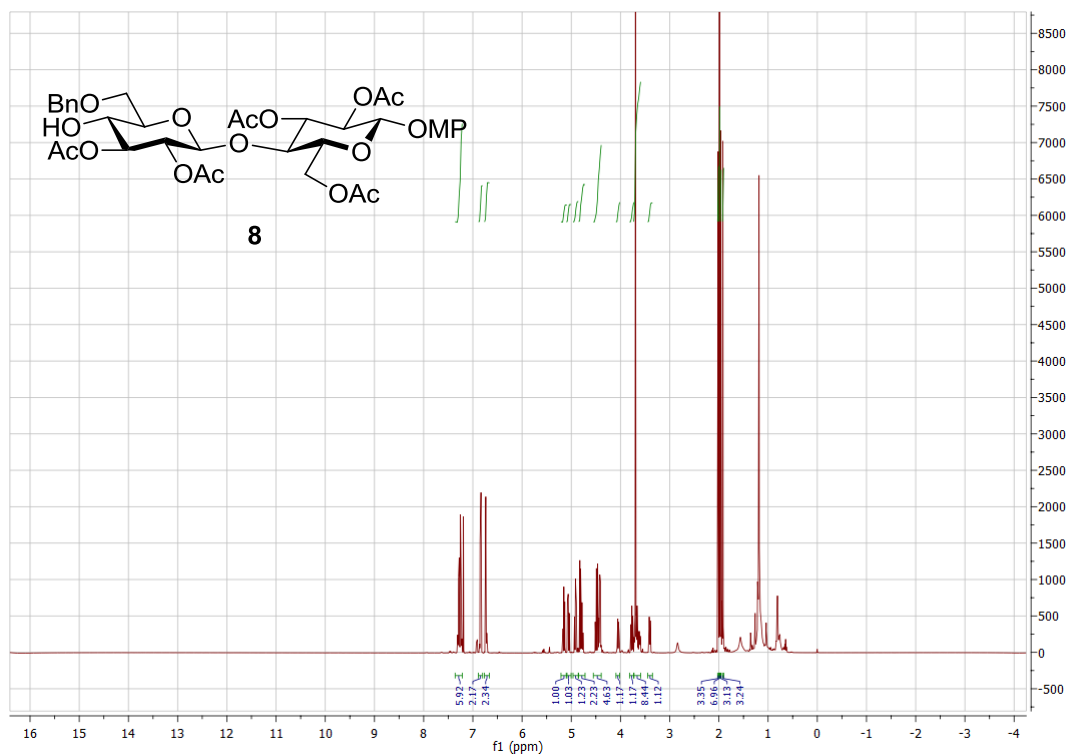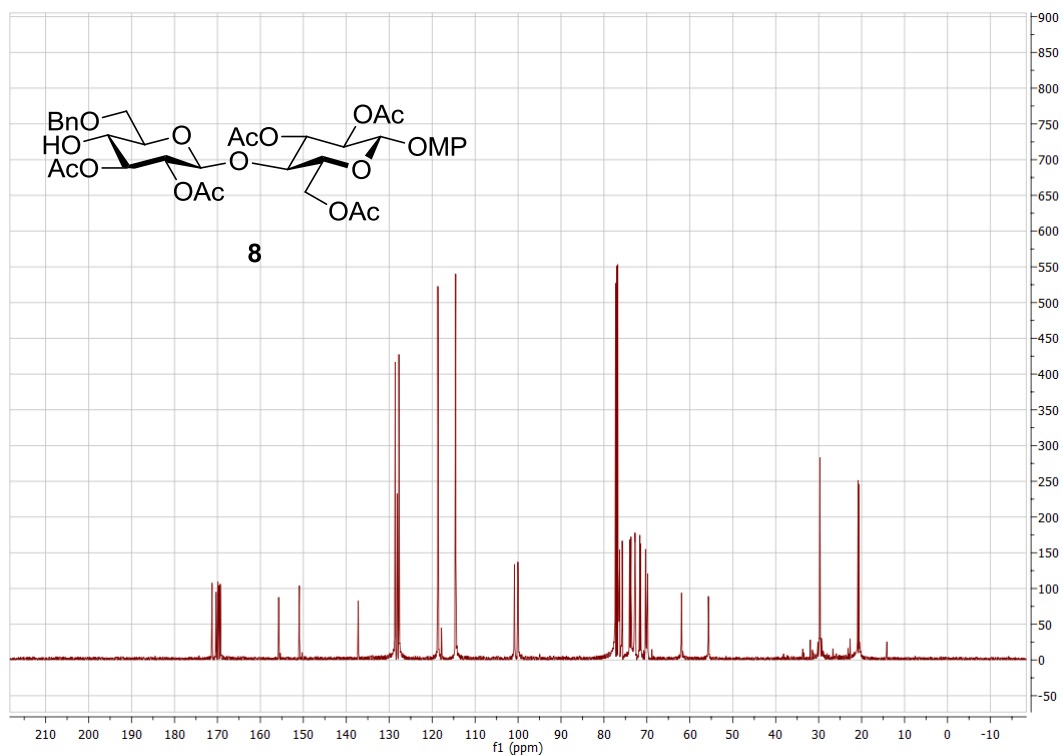

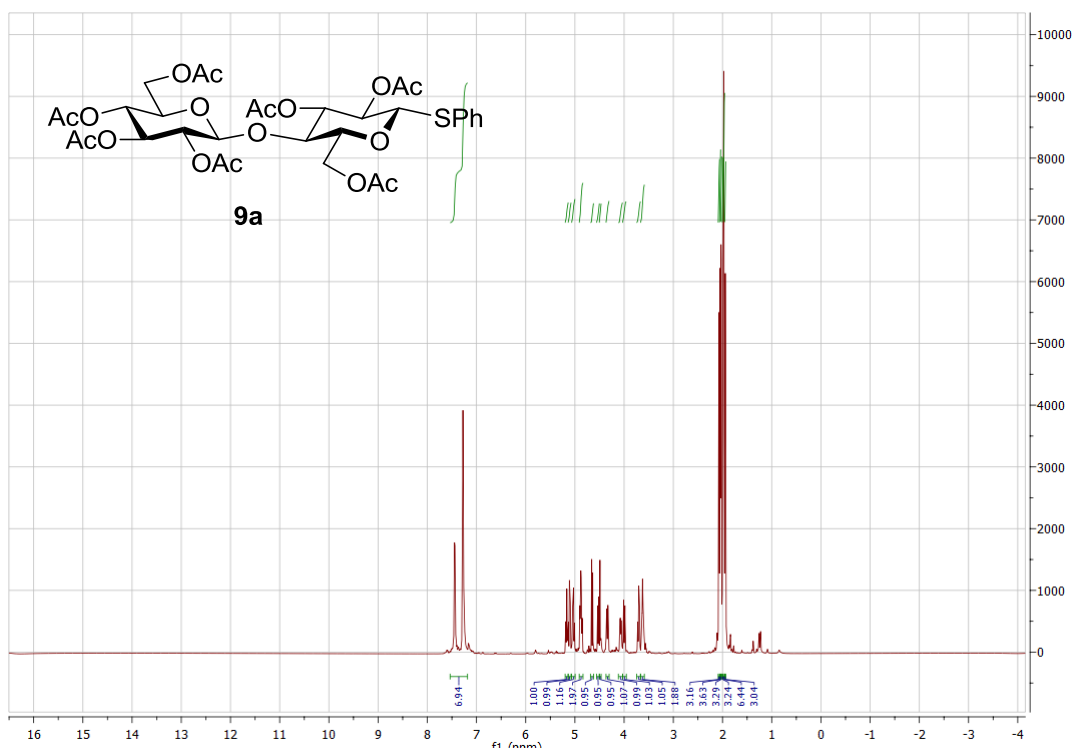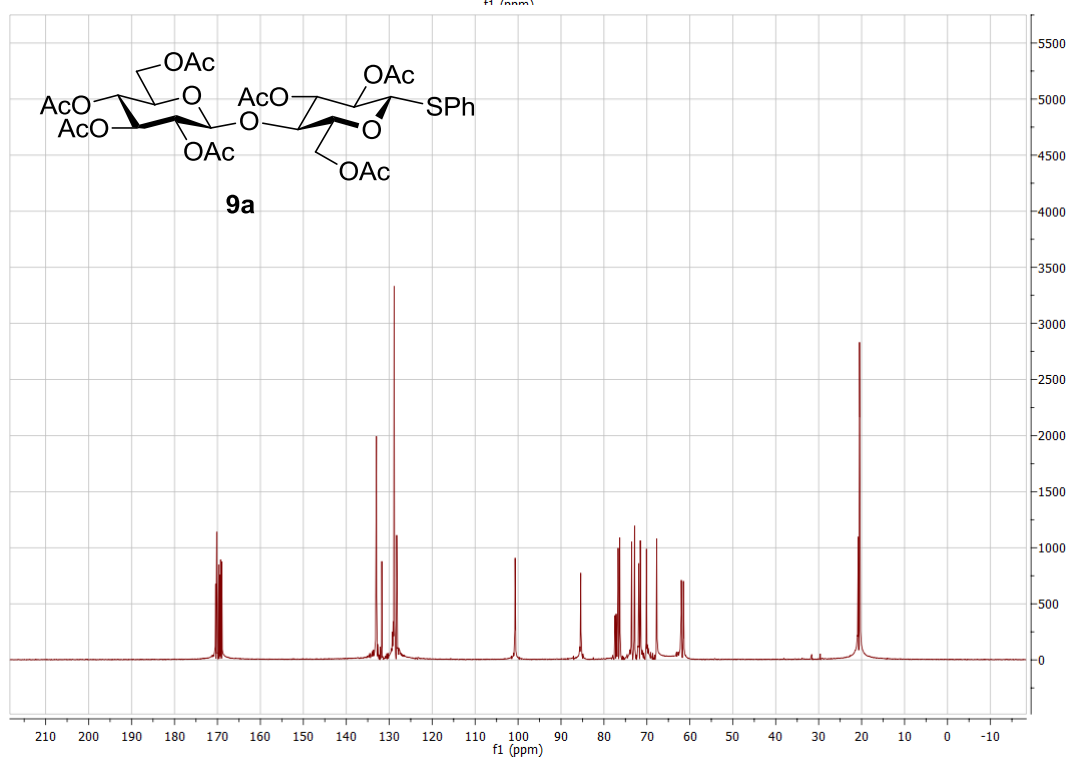

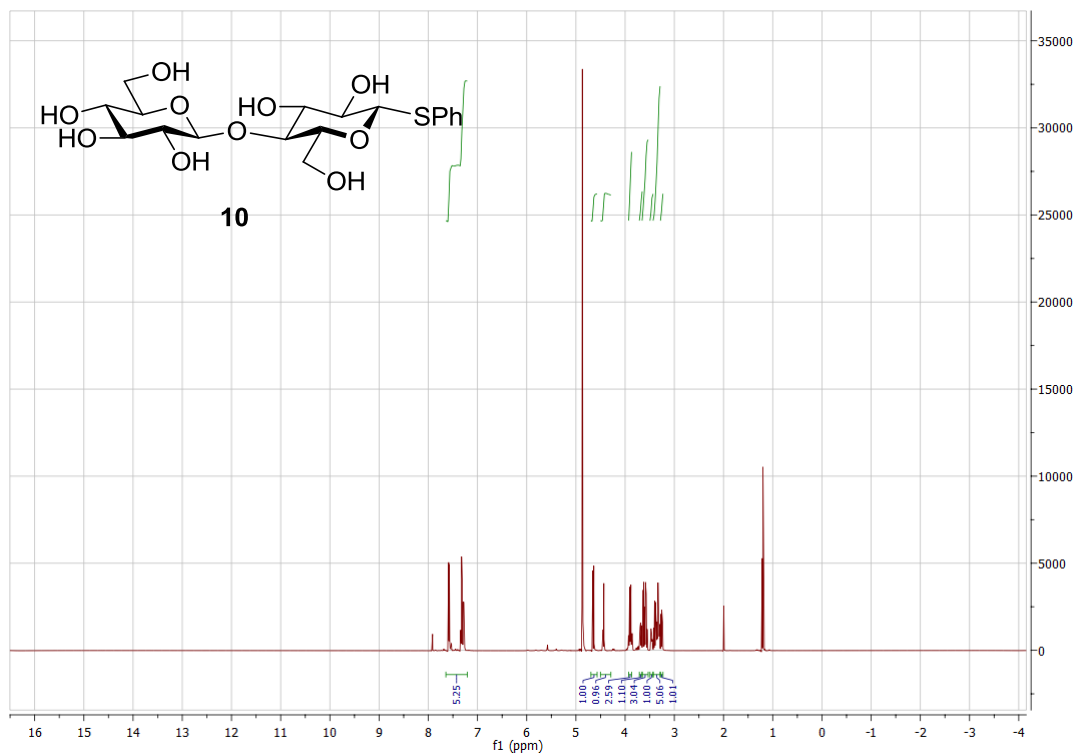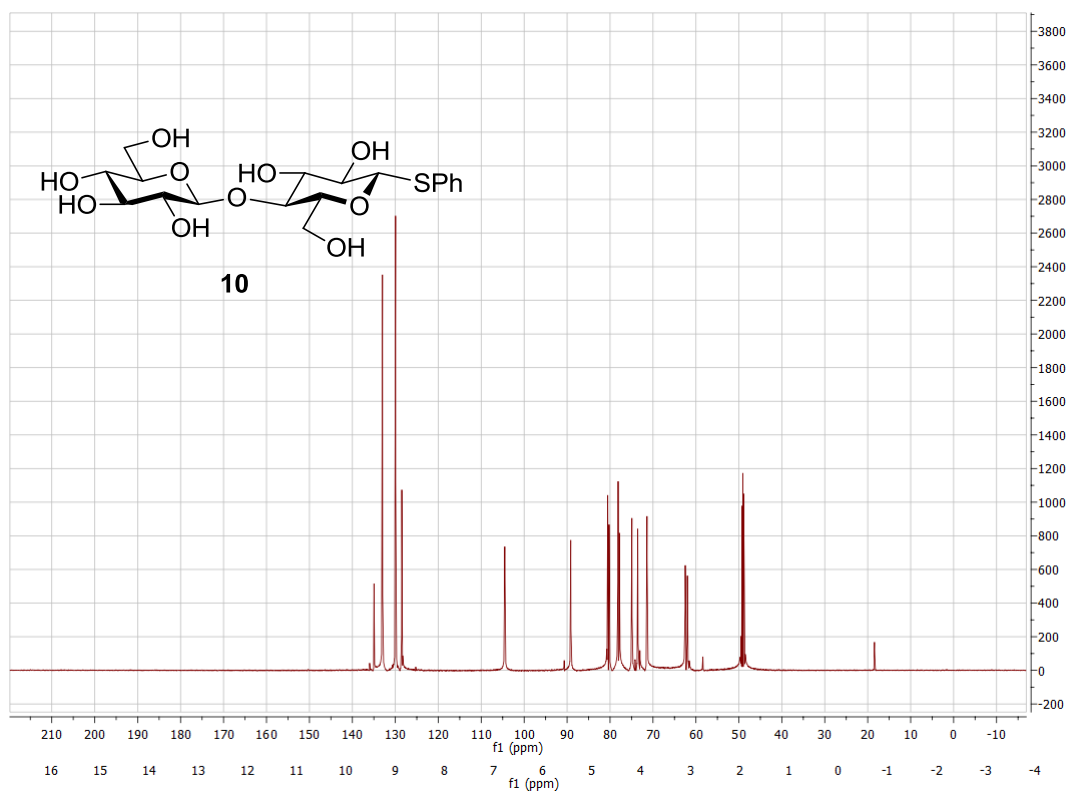

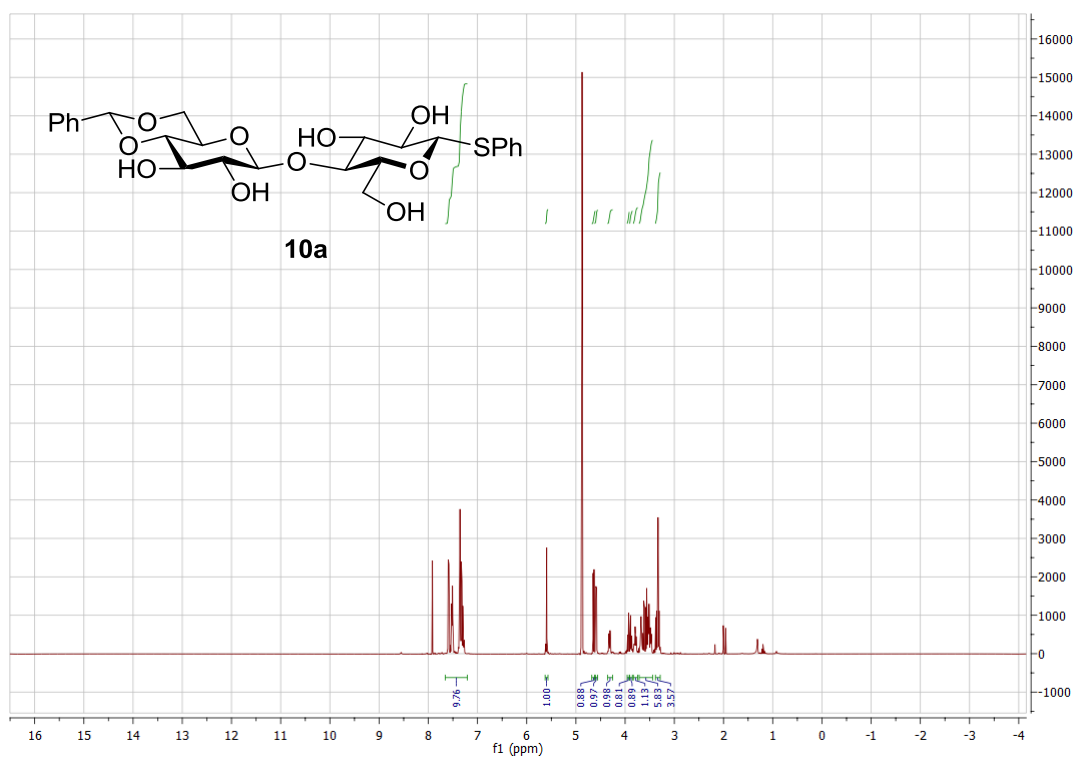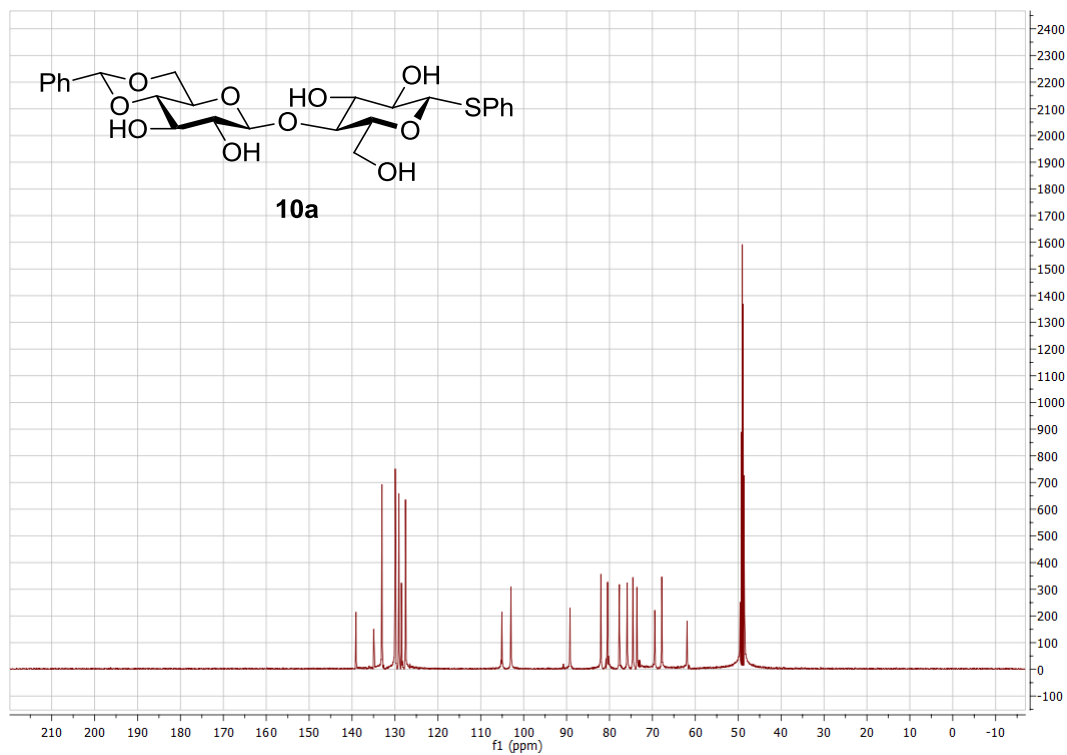



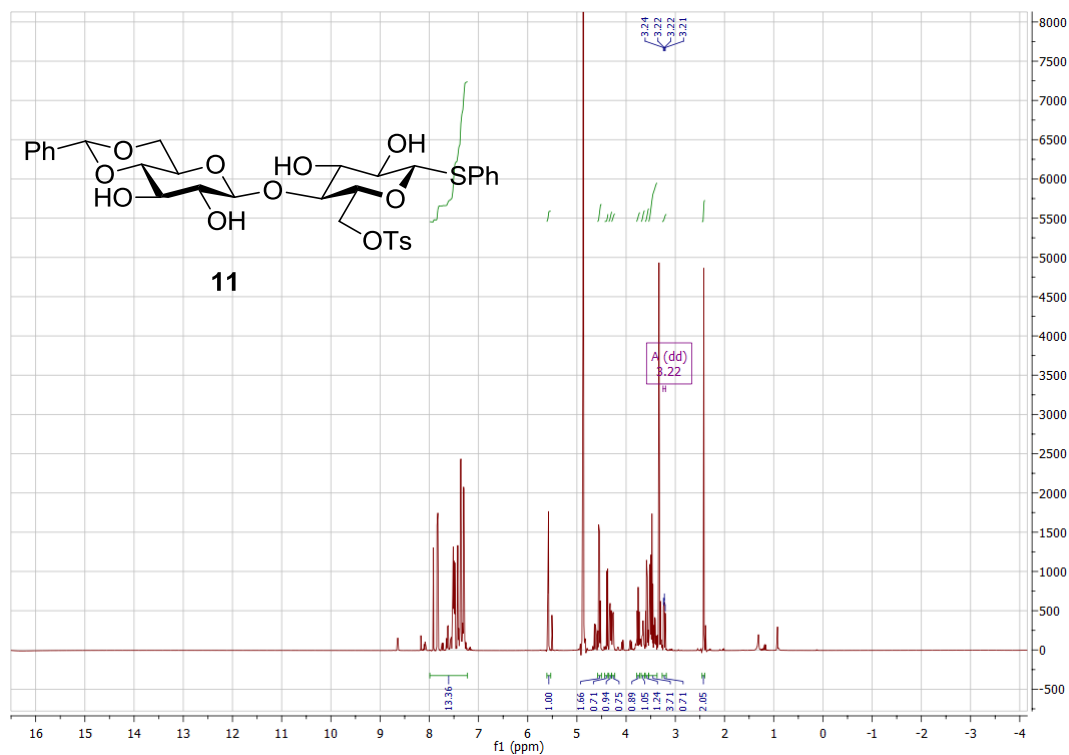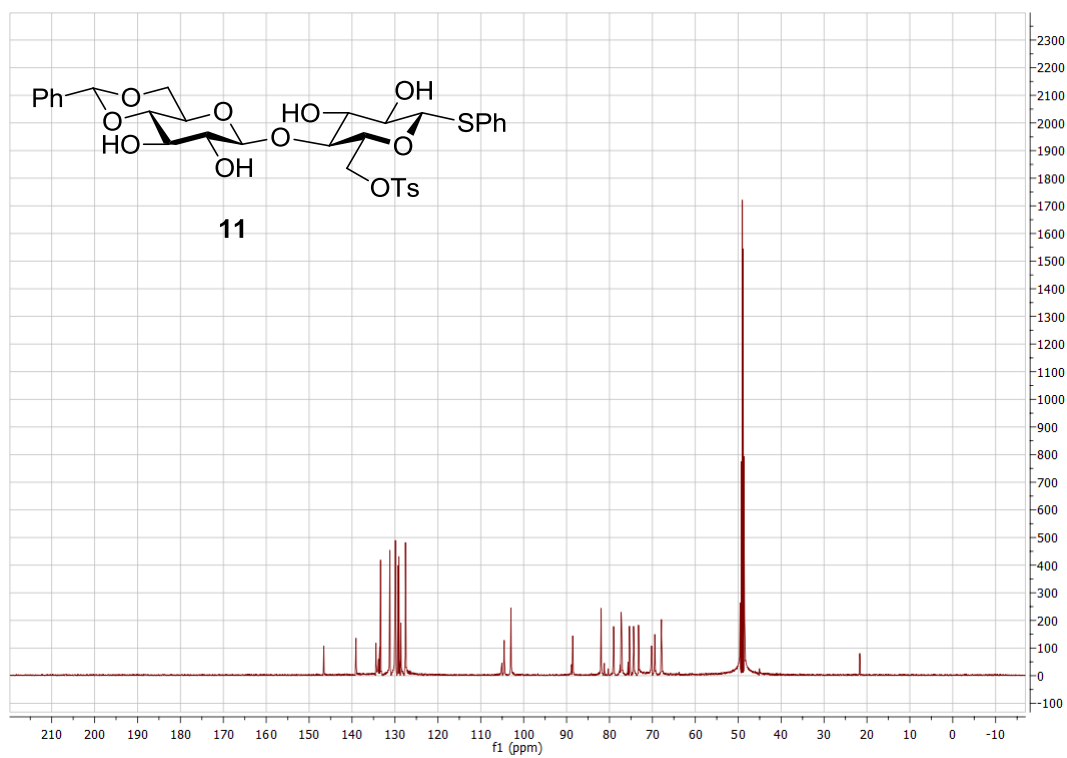

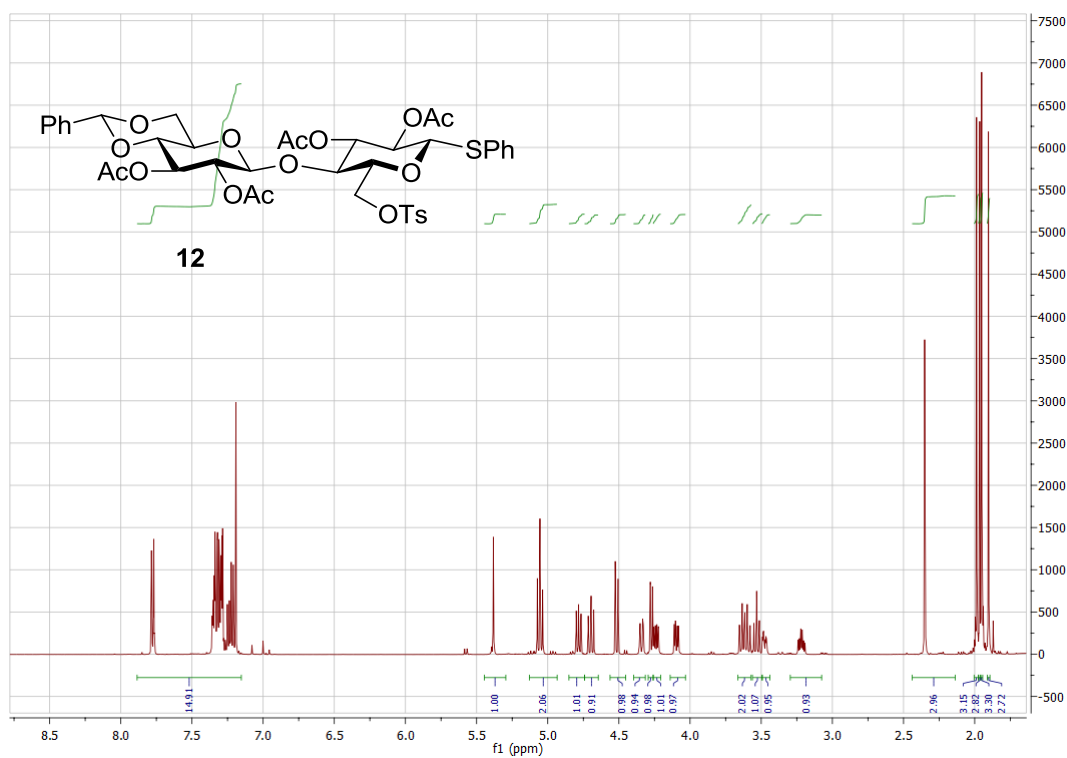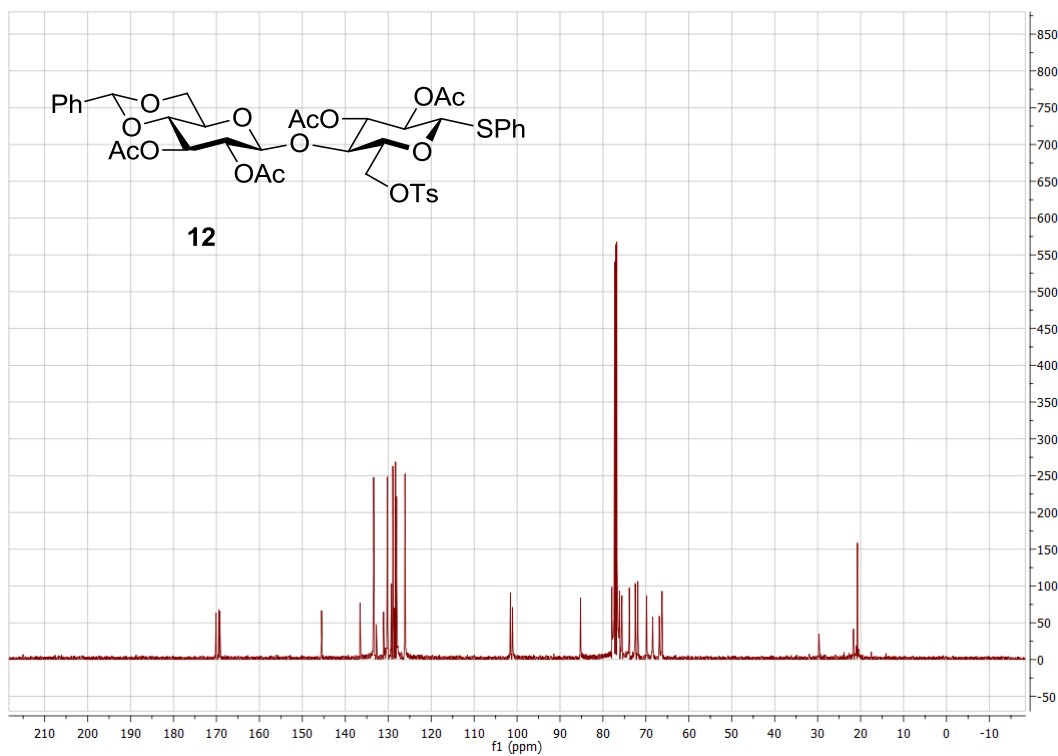

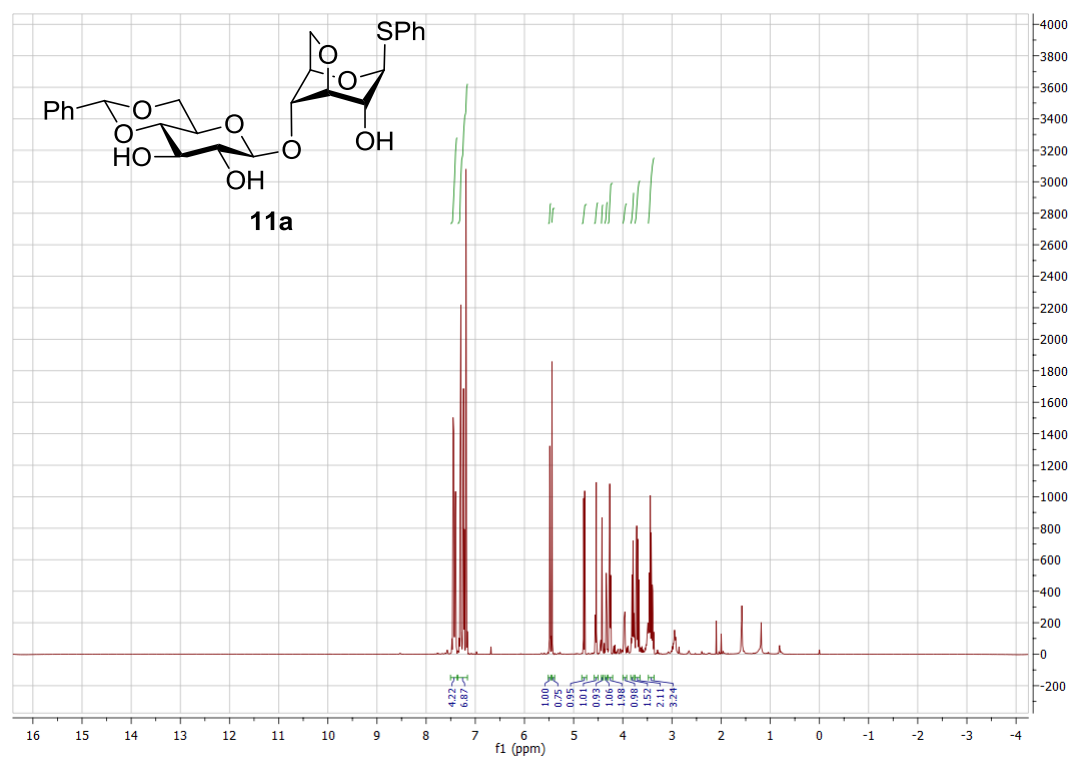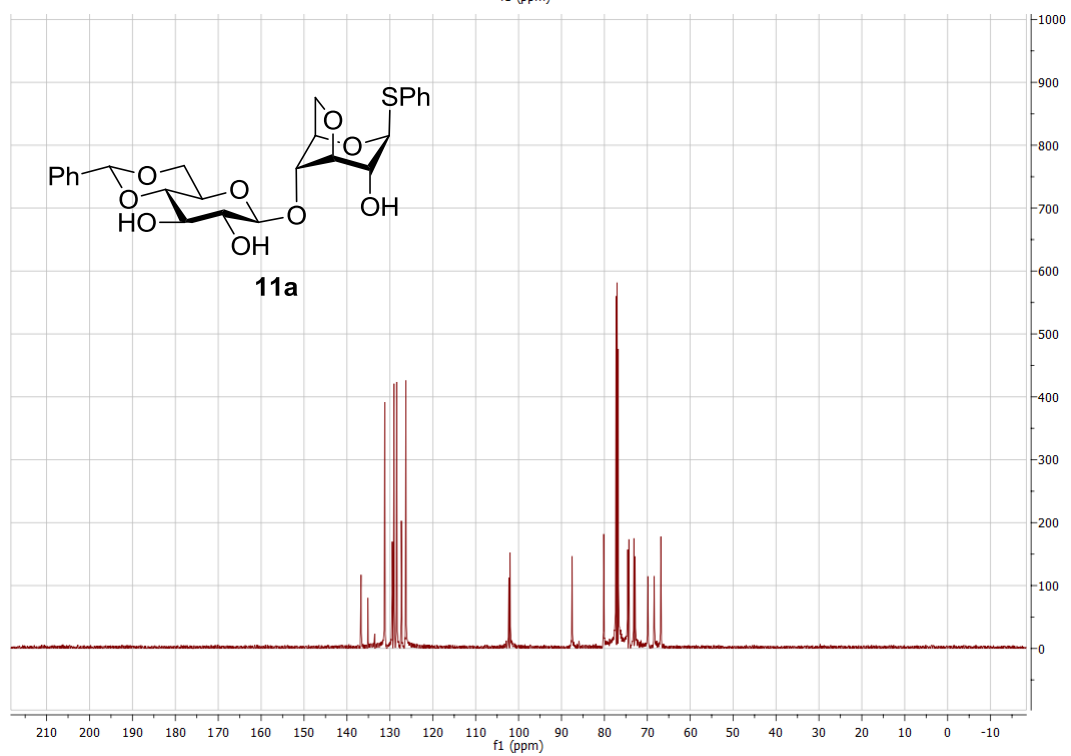

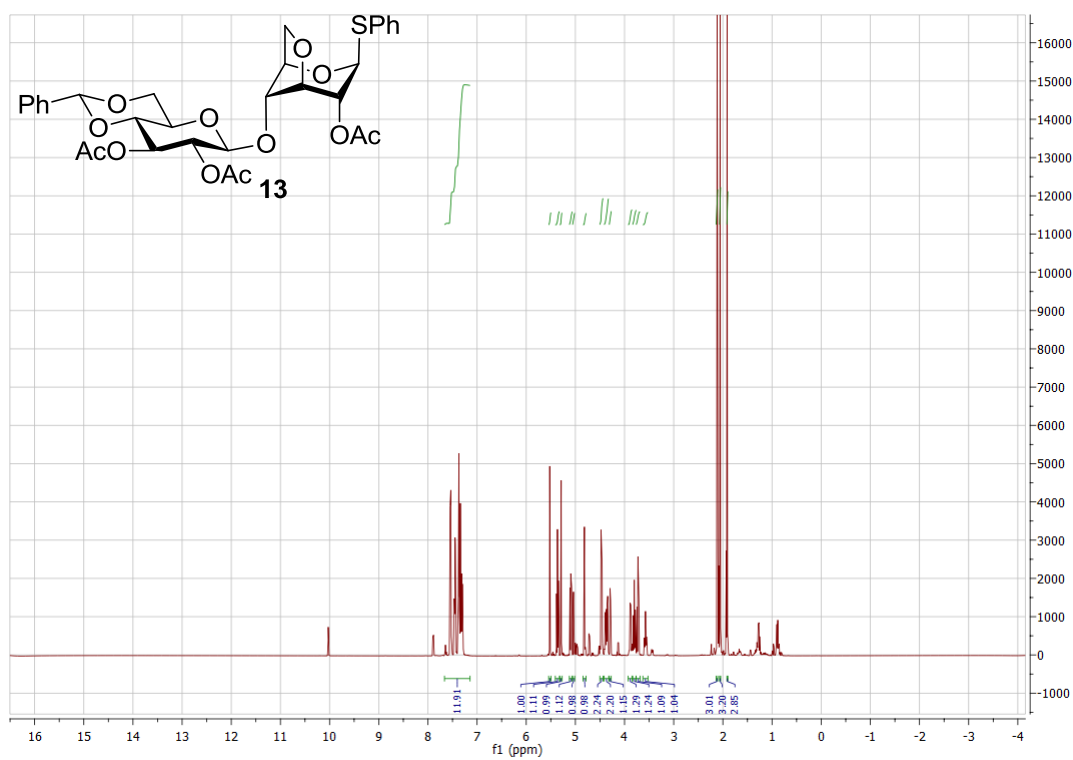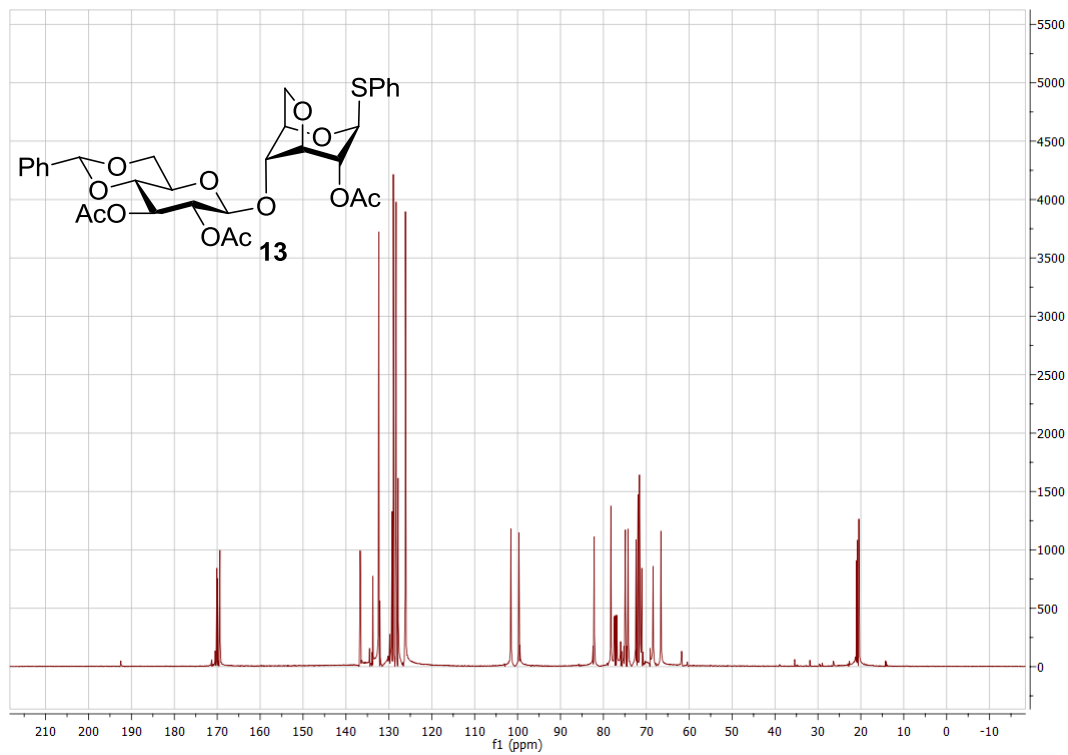

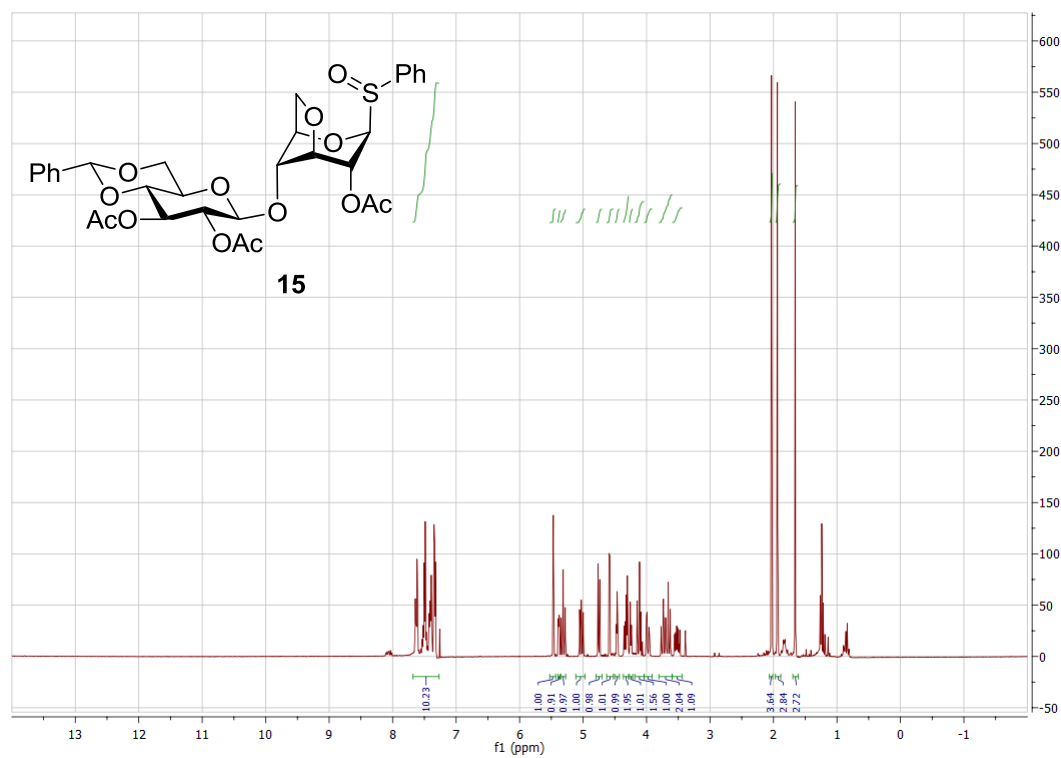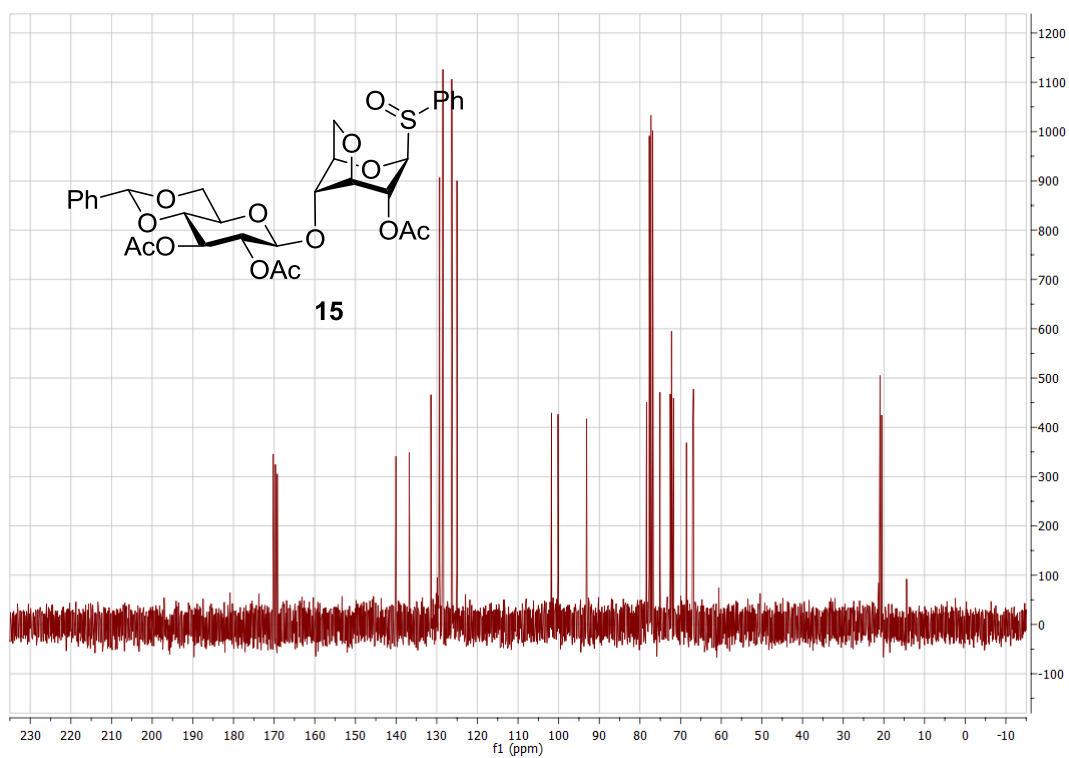

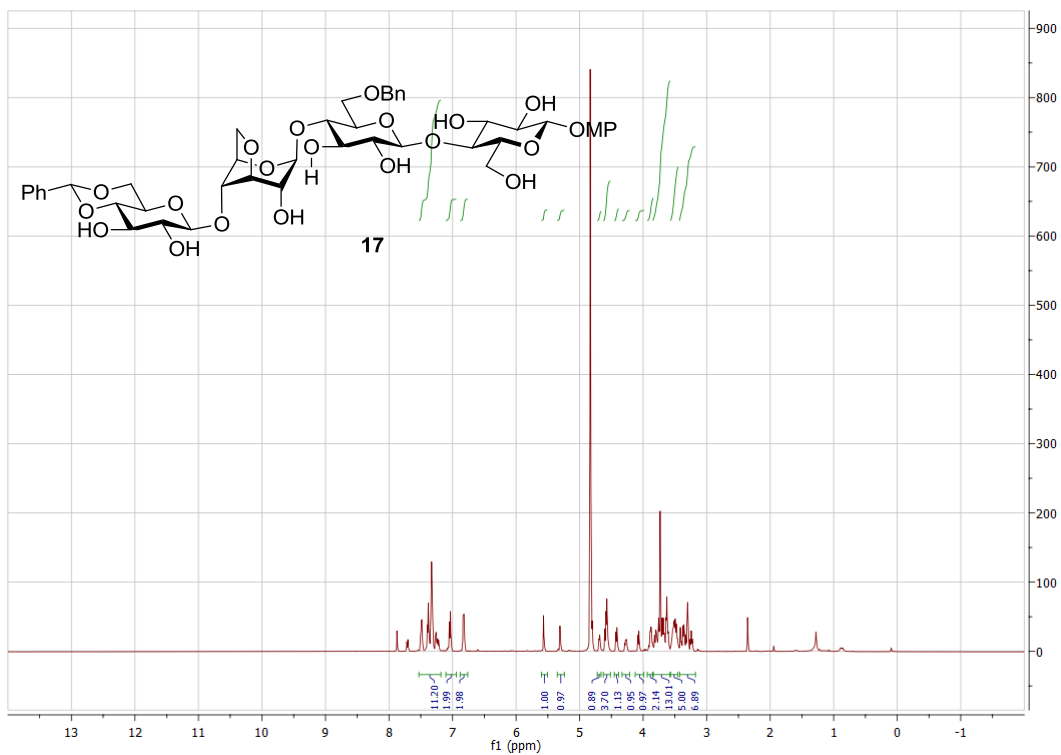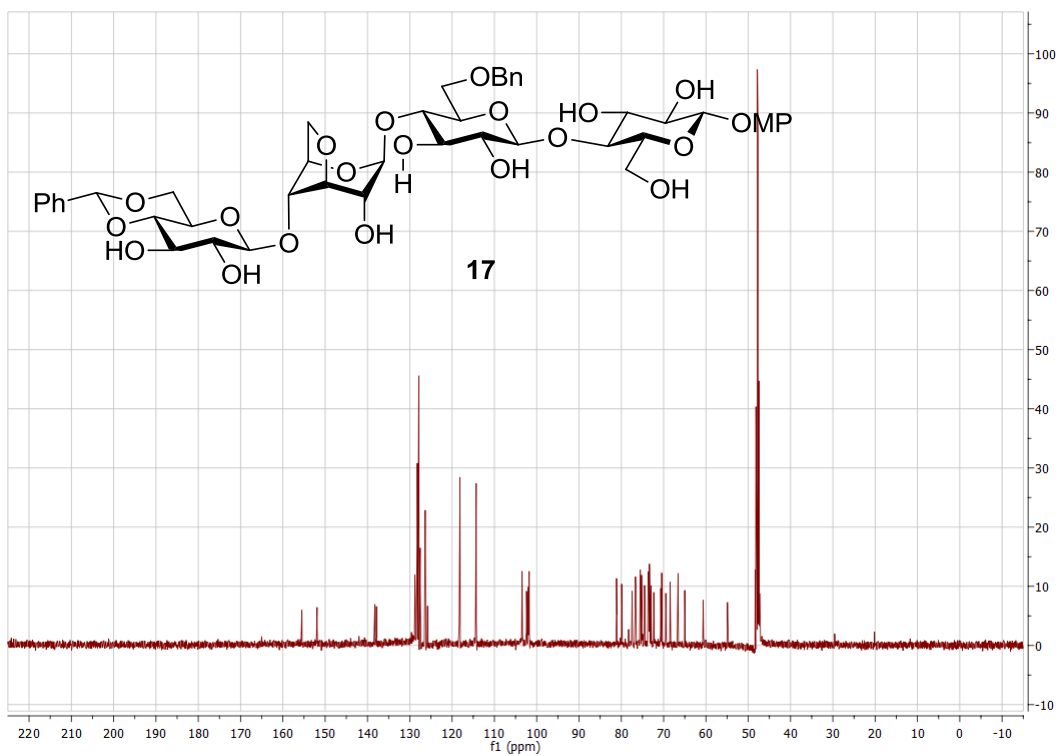

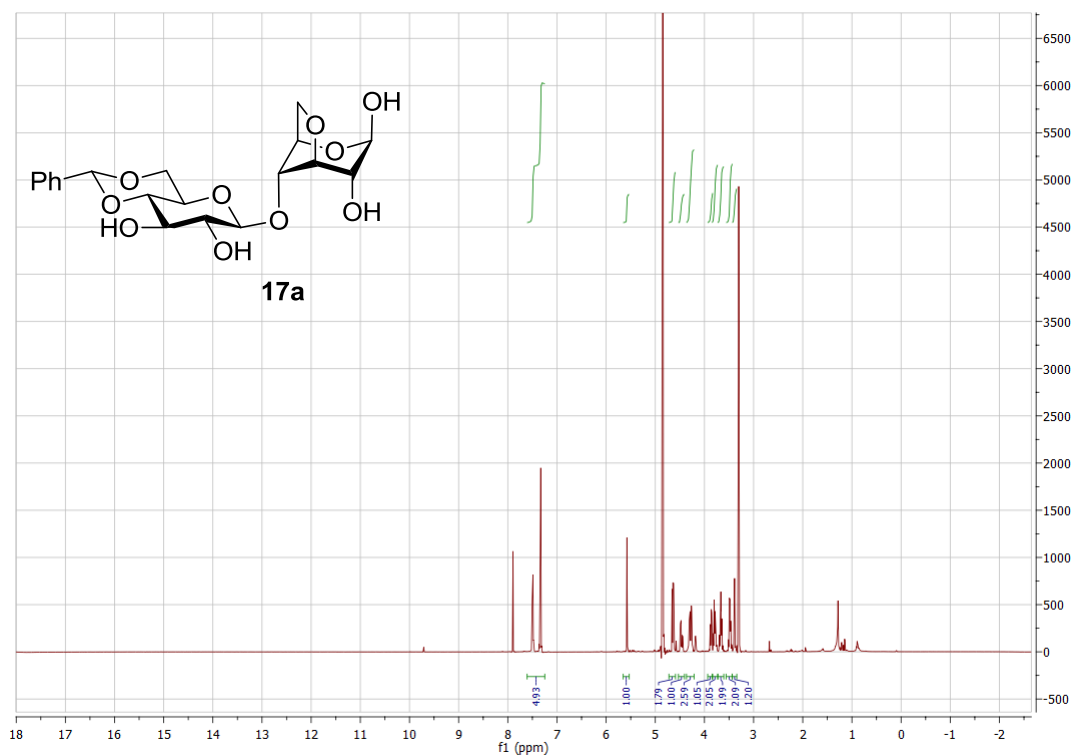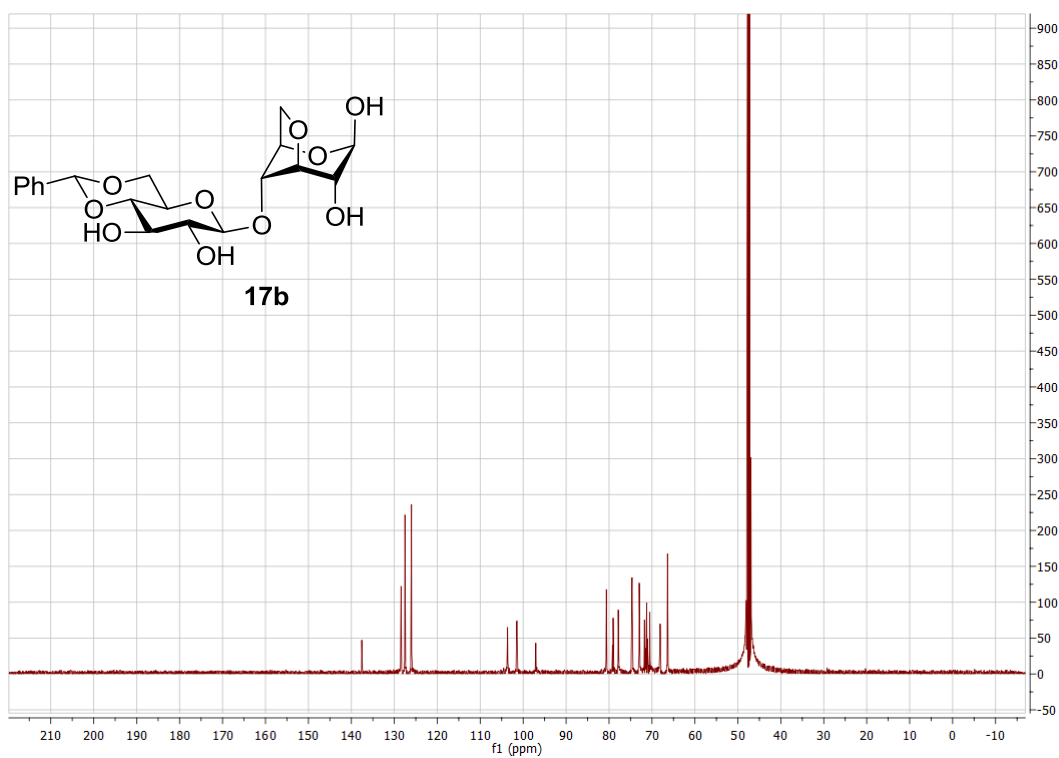

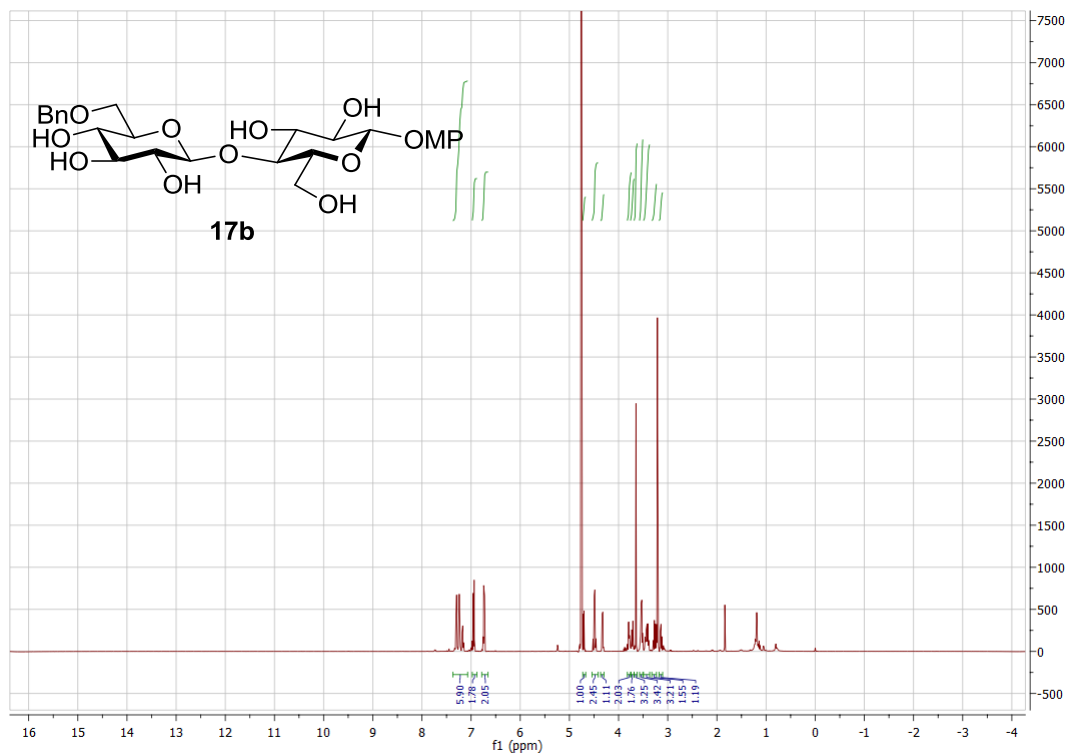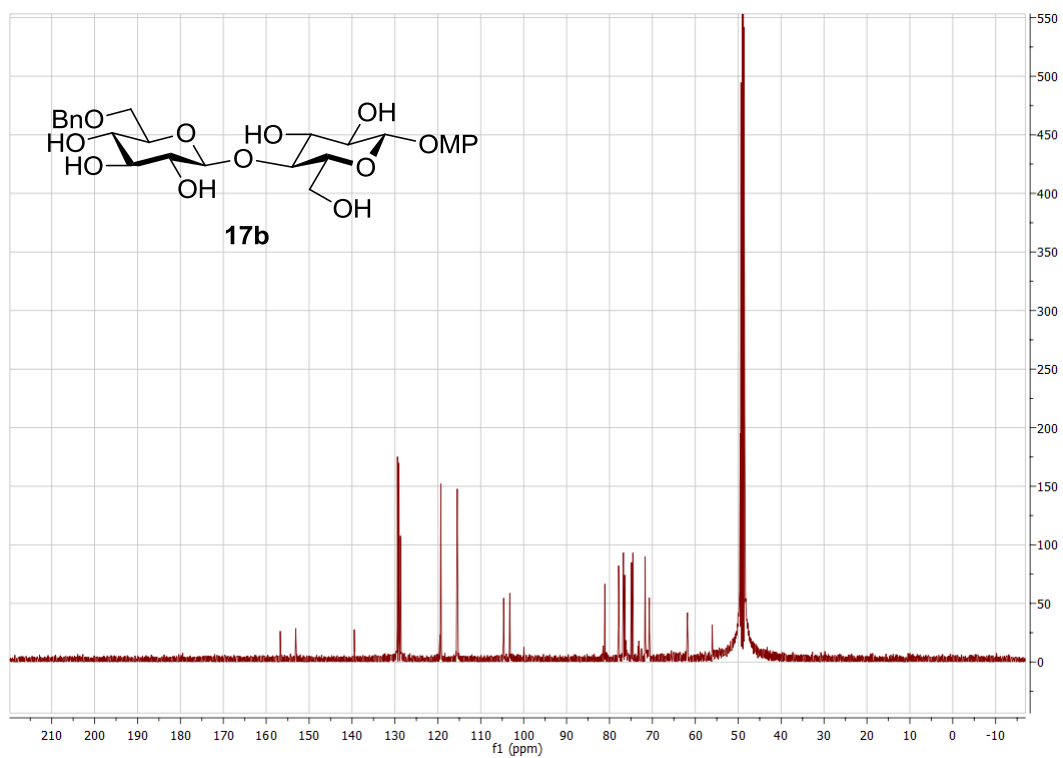



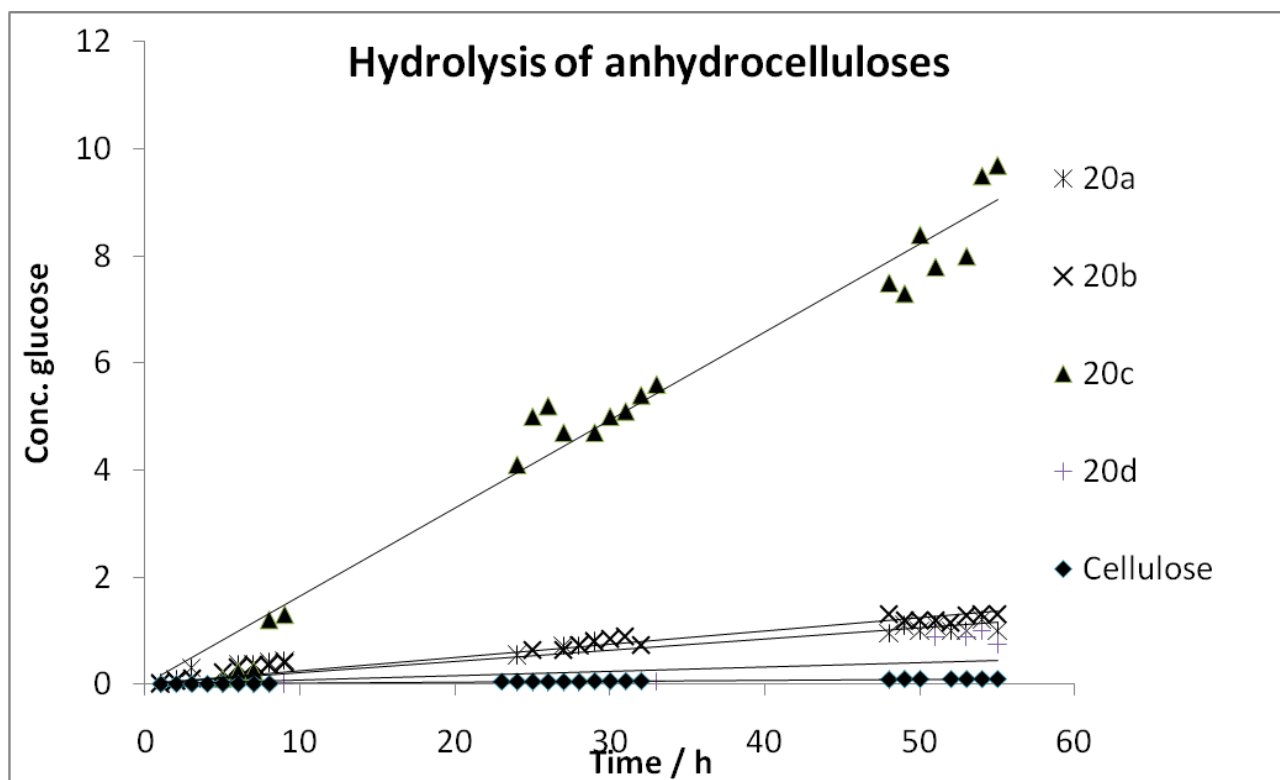

**Figure S1.** Formation of glucose from the hydrolysis of anhydrocelluloses **20a-d** and cellulose by treatment with 2M HCl at 60 °C. The glucose concentration is in mM (determined by ion chromatography).

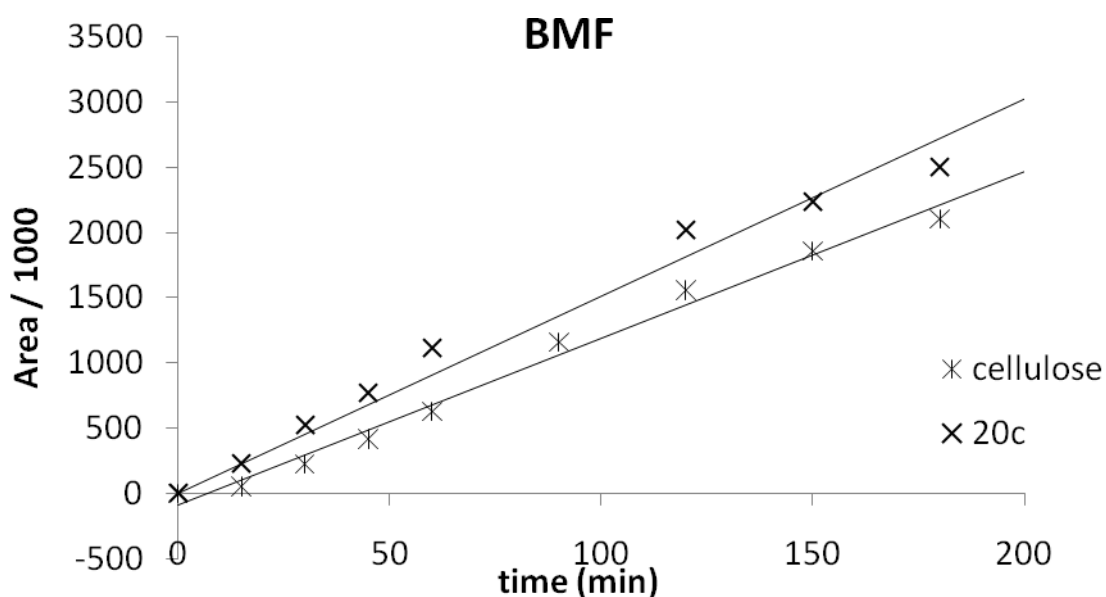

**Figure S2.** Formation of BMF (**21**) from anhydrocellulose **20c** and cellulose by treatment with HBr/LiBr. The concentration of **21** was determined by HPLC.

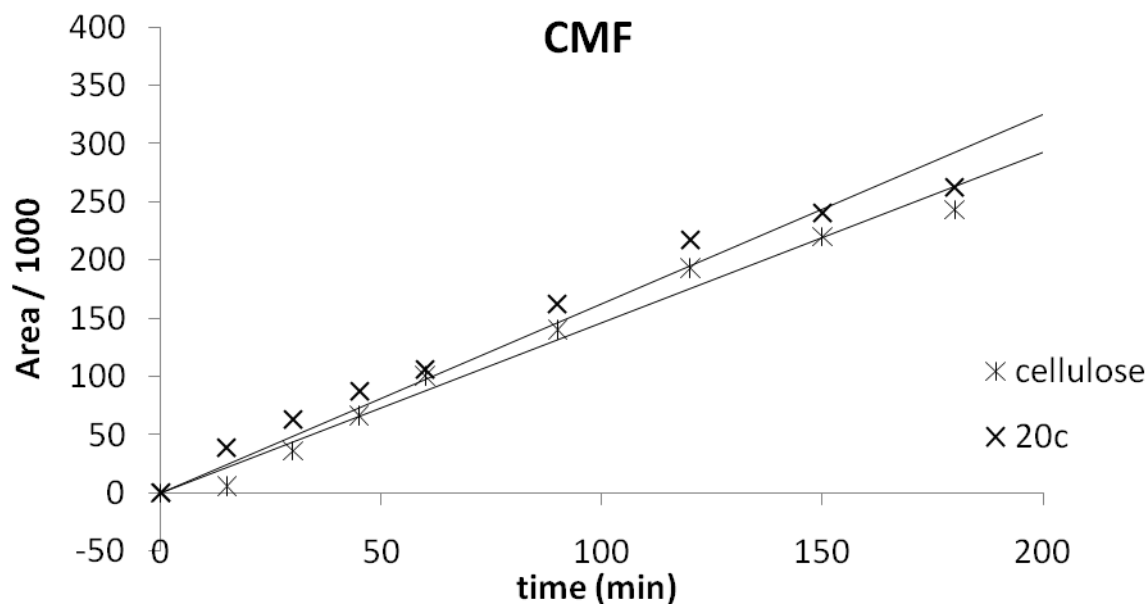

**Figure S3.** Formation of CMF (**22**) from anhydrocellulose **20c** and cellulose by treatment with HCl/LiCl. The concentration of **22** was determined by HPLC.

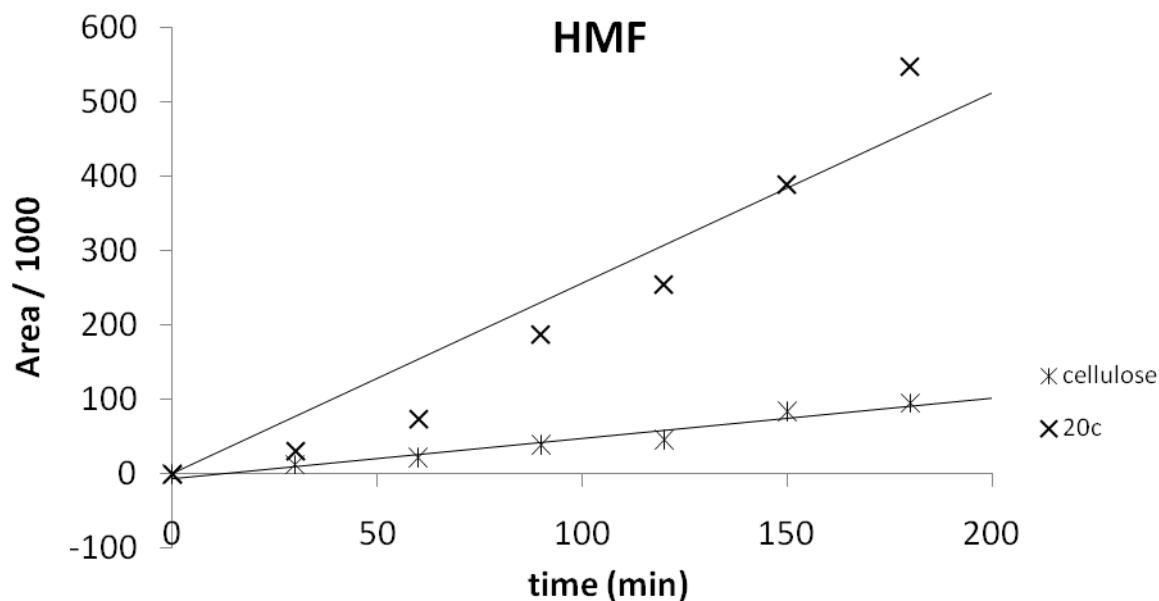

**Figure S4.** Formation of HMF (**23**) from anhydrocellulose **20c** and cellulose by treatment with CrCl<sub>2</sub>/HCl. The concentration of **23** was determined by HPLC.
